# Supplementary material
Source: PubMed Central journal article supplement (PMC2881480)
Supplement: NIHMS199102-supplement-01.pdf [file NIHMS199102-supplement-01.pdf]

**Supporting Online Material**

**Defective Hepatic Autophagy in Obesity Promotes ER Stress and Causes  
Insulin Resistance**

Ling Yang, Ping Li, Suneng Fu, Ediz S. Calay, and Gökhan S. Hotamisligil

Department of Genetics and Complex Diseases

Harvard School of Public Health, Boston, MA 02115

LY and PL contributed equally to this work

Address all correspondence to:

Gökhan S. Hotamisligil, M.D., Ph.D.

Departments of Genetics and Complex Diseases, Nutrition

Broad Institute of Harvard and MIT

Harvard School of Public Health, Boston, MA 02115

Fax: 617 432 1941, Phone: 617 432 1950

Email: ghotamis@hsph.harvard.edu

**Figure S1**

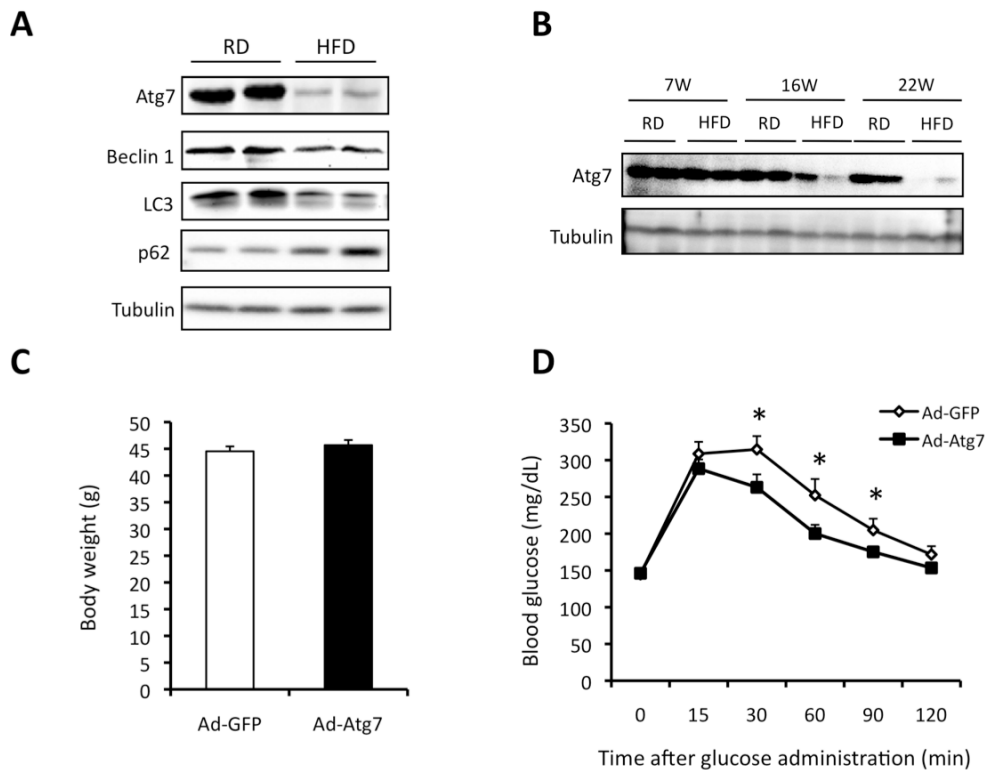

**Figure S1. Regulation of systemic insulin action by Atg7 in a high fat diet-induced obesity model.** **A.** Autophagy was examined in liver of mice fed with high fat diet (5 month on HFD) and regular diet (RD) by western blot analysis, using the conversion of LC3-I to LC3-II, expression of Beclin 1 and Atg7 as autophagy markers. **B.** Atg7 expression level during the course of HFD feeding was examined by western blot assay. The C57BL/6J mice were fed with high-fat diet after weaning for 20 weeks, followed by injection of adenovirus carrying GFP (Ad-GFP, n=11) or Atg7 (Ad-Atg7, n=11). After 7 days, body weights were measured (**C**) and glucose tolerance tests (**D**) were performed. Data are shown as mean  $\pm$  SEM. Asterisk indicates statistical significance determined by repeated measures two-way ANOVA followed by post-test (\* indicates  $p < 0.05$ ).

**Figure S2**

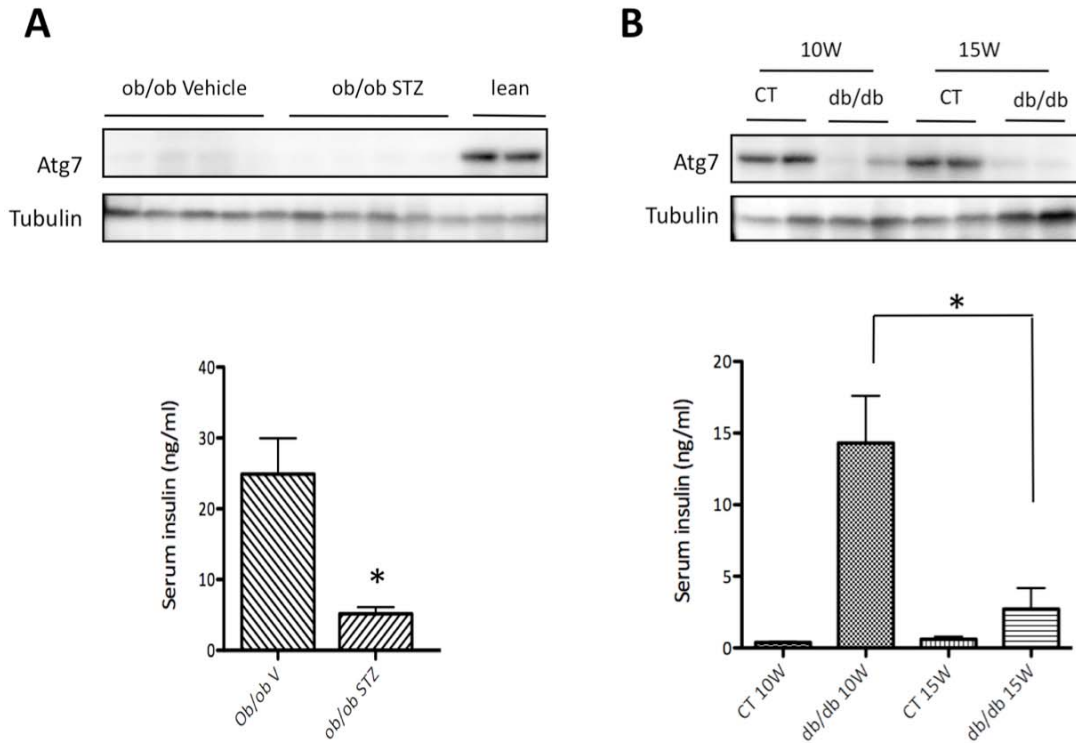

**Figure S2. The effect of hyperinsulinemia on Atg7 expression in obese mice.** Atg7 expression level was examined in liver tissue of *ob/ob* mice (**A**) treated with STZ or *db/db* mice at different ages (**B**). Serum insulin levels were measured in mice after 6 hours daytime food withdrawal, and shown at the bottom of each blot. Data are shown as mean $\pm$ SEM. Asterisk indicates statistical significance determined by student's-*t* test (\* $p$ <0.05).

**Figure S3**

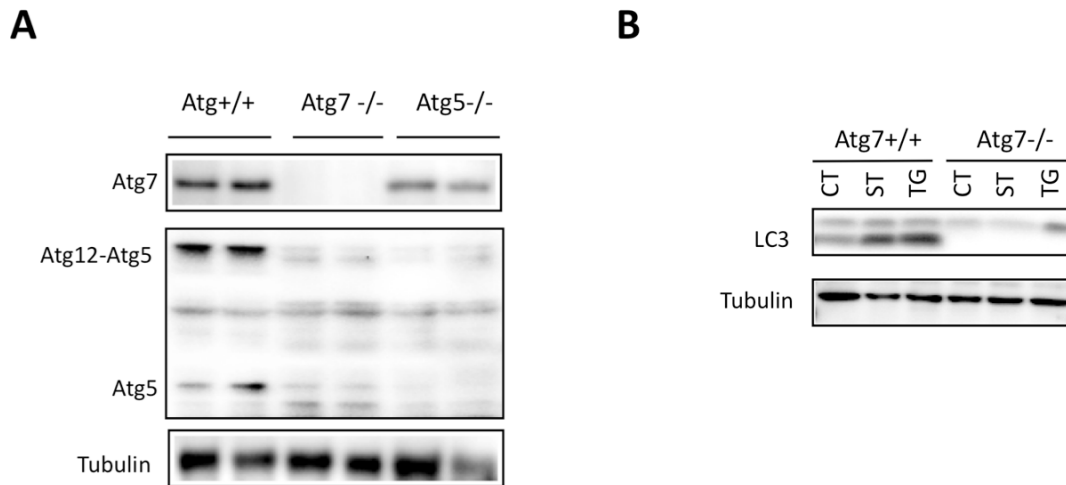

**Figure S3. Regulation of autophagy in Atg7- or Atg5-deficient MEFs.** Atg7, Atg12-Atg5, and Atg5 expression levels in MEF cells lacking Atg7 or Atg5 (**A**) and the conversion of LC3 (**B**) in Atg7-/- mouse embryonic fibroblasts (MEF) in the presence or absence of autophagy inducers: starvation (ST) and thapsigargin (TG, 200nM) were examined.

**Figure S4**

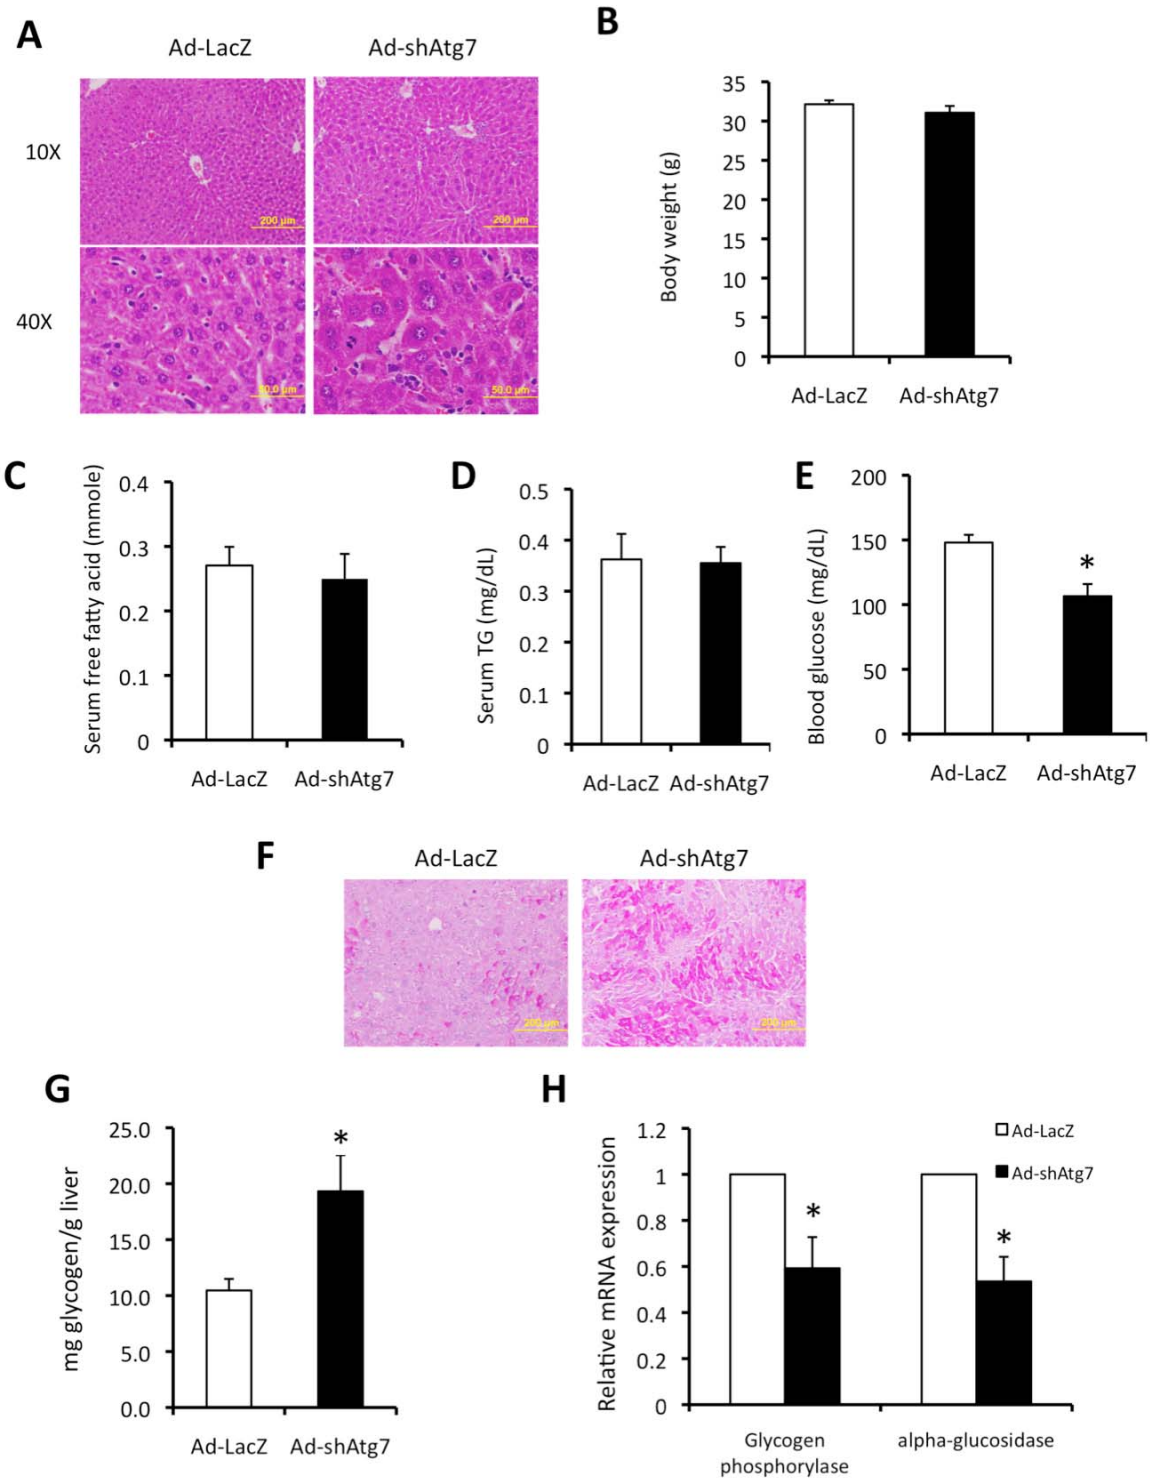

**Figure S4. Metabolic effects of Atg7 suppression in liver tissue of lean mice.** **A.** Representative images of H&E staining of liver tissue sections from lean mice (male, 14-weeks-old, C57BL/6J) injected with the control adenovirus expressing LacZ shRNAi to LacZ (Ad-LacZ) or Atg7 (Ad-shAtg7) shRNAi. **B.** Body weight, Serum free fatty acid (**C**), triglyceride (TG) (**D**) and glucose levels (**E**) were measured in lean mice after 6 hours food withdrawal following Atg7 knockdown. **F.** Representative images of PAS staining in liver tissue sections from lean mice (male, 14-weeks-old, C57BL/6J) injected with the control (Ad-LacZ) or Atg7 (Ad-shAtg7) shRNAi containing adenoviruses after 6 hours fasting. **G.** Glycogen levels were measured in liver tissue collected from mice injected with Ad-LacZ or Ad-shAtg7. **H.** mRNAs coding for glycogen phosphorylase and  $\alpha$ -glucosidase were examined by quantitative RT-PCR and the results presented as gene expression levels in Atg7 group normalized to controls (Ad-LacZ). All data are shown as mean $\pm$ SEM. Asterisk indicates statistical significance determined by student's *t* test (\* $p$ <0.05).

Figure S5

**A**

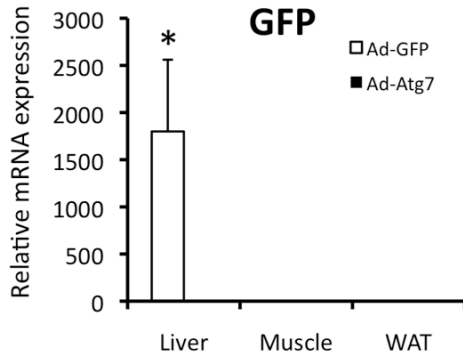

**B**

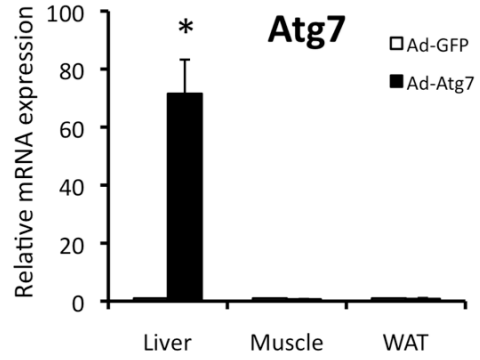

**C**

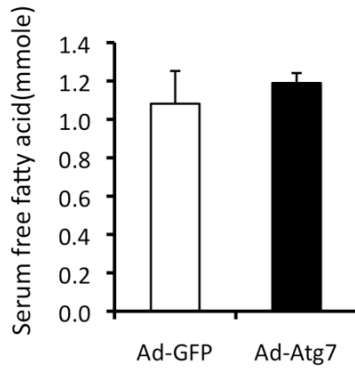

**D**

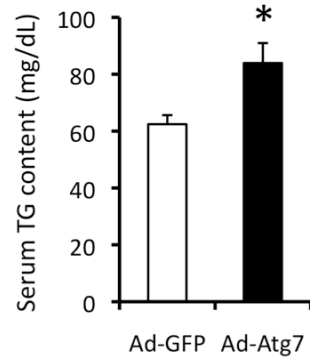

**E**

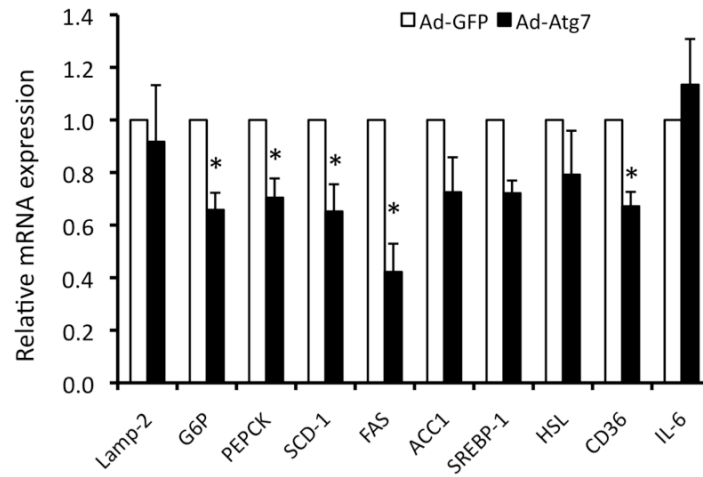

**Figure S5. Metabolic effects of liver Atg7 restoration in obese mice.** mRNAs coding for GFP (**A**) or Atg7 (**B**) were examined in liver, muscle and white adipose tissue (WAT) of *ob/ob* mice injected with Ad-GFP or Ad-Atg7 by quantitative RT-PCR. Results are presented as gene expression levels in Ad-GFP group normalized to Ad-Atg7 group (**A**), or in Ad-Atg7 group normalized to Ad-GFP controls (**B**). Serum free fatty acid (**C**) and serum triglyceride (TG) (**D**) were measured in *ob/ob* mice expressing Atg7 (n=8) or control vector (n=8). **E.** mRNA coding for genes involved in gluconeogenesis and lipogenesis in liver were examined by quantitative RT-PCR. Results are presented as gene expression levels in Ad-Atg7 group normalized to Ad-GFP controls. All data are shown as mean±SEM. Asterisk indicates statistical significance determined by student's-*t* test (\*p<0.05).



## Figure S6

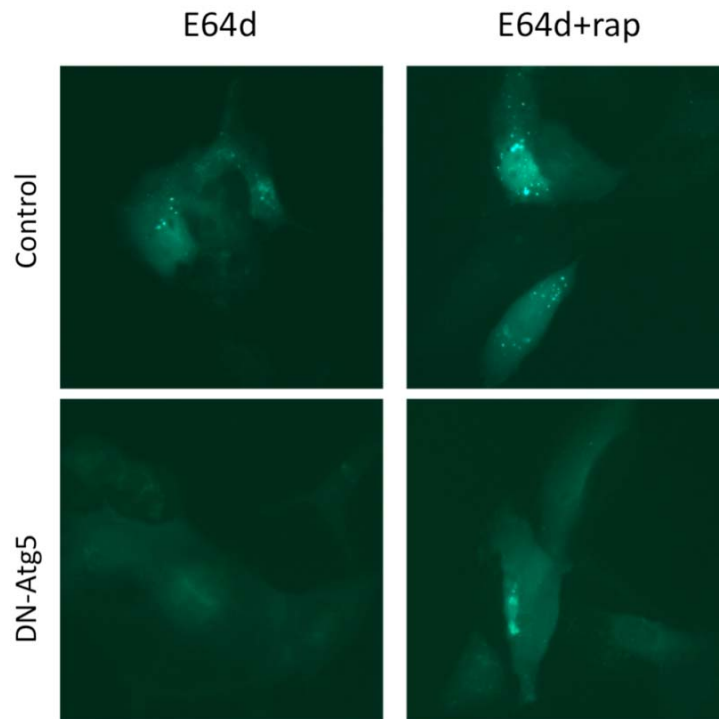

**Figure S6. *Suppression of autophagy by dominant-negative Atg5.*** Representative fluorescence microscopy images (40x) of GFP-LC3 punctate structures in human hepatoma cell line, Huh-7 cells expressing GFP-LC3 alone (CT), or GFP-LC3 plus DN-Atg5 (DN-Atg5), after treatment with rapamycin (100nM) for 4 hours in the presence of the lysosomal proteases inhibitor, E64d. These experiments were performed to verify the efficiency of the dominant-negative (DN)-Atg5 to block autophagy.

## **SUPPLEMENTAL EXPERIMENTAL PROCEDURES**

*Mouse models:* Male *db/db* mice at 10 weeks of age and its controls (C57Bl.KS/J) were purchased from Jackson Labs, kept on a 12-hrs light cycle, and fed with regular rodent diet. For streptozotocin (STZ) experiments, male *ob/ob* mice (8 weeks) were injected with vehicle (0.05M sodium citrate) or STZ at 200mg/kg dose, every seven days, for two times via intraperitoneal route. The 6-hour fasting blood glucose levels were monitored in *db/db* mice and STZ-treated *ob/ob* mice every three days.

*Glycogen assays:* Liver glycogen content in mice transduced with Ad-shAtg7 or control virus (Ad-LacZ) was measured, as described in (Le Lay et al., 2009). Briefly, 100mg of liver tissue samples were homogenized in 6% PCA. After centrifugation, the supernatant was collected, combined with one volume of H<sub>2</sub>O, adjusted to pH:6.7 with KOH, and incubated with amyloglucosidase at 40°C for 2hours. Glucose concentrations were then determined using an Amplex Red Glucose/Glucose Oxidase assay system (Invitrogen).

*Quantitative real time RT-PCR:* The primers used to quantitate the lipogenesis and gluconeogenesis genes were described as before (Cao et al., 2008; Furuhashi et al., 2007); the primers used for mouse liver glycogen phosphorylase are: forward: 5'-GCGACTACTACTTCGCCCTTG-3'; reverse:5'-GAGGTAATACACCCTCTTGGGA-3'; the primers used for mouse acid alpha-glucosidase are: forward:5'-CACCAGGAAGGTTACAAGCCA-3'; reverse: 5'-GTCGGGGGCACAGTCAAAG-3'. The primers for mouse Grp78 are: forward: 5'-TCATCGGACGCACTTGGAA-3', reverse: 5'-CAACCACCTTG

AATGGCAAGA-3'; the primers for mouse PDI are: forward: 5-CAAGATCAAGCCCCACCTGAT-3', reverse: 5'-AGTTGCCCCAACCAGTACTT-3'; the primers for mouse Erdj4 are: forward: 5'-CCCCAGTGTCAAACCTGTACCAG-3', reverse: 5'-AGCGTTTCCAATTTTCCATAAATT-3'; the primers for mouse Gadd34 are: forward: 5'-GAGGGACGCCCACTTC-3', reverse: 5'-TTACCAGAGACAGGGGTAGGT-3'; the primers for mouse Chop are: forward: 5'-CCACCACACCTGAAAGCAGAA-3', reverse: 5'-AGGTGAAAGGCAGGGACTCA-3'; the primers for mouse Lamp2 were used as described (Yanagawa et al., 2007); the primers for mouse Atg5 were purchased from SABioscience; the primers used for mouse Atg7 are: forward: 5'-TGCCTATGATGATCTGTGTC-3', reverse: 5'-CACCAACTGTTATCTTTGTCC-3'.

## REFERENCES

Cao, H., Gerhold, K., Mayers, J.R., Wiest, M.M., Watkins, S.M., and Hotamisligil, G.S. (2008). Identification of a lipokine, a lipid hormone linking adipose tissue to systemic metabolism. *Cell* 134, 933-944.

Furuhashi, M., Tuncman, G., Gorgun, C.Z., Makowski, L., Atsumi, G., Vaillancourt, E., Kono, K., Babaev, V.R., Fazio, S., Linton, M.F., Sulsky, R., Robl, J.A., Parker, R.A., and Hotamisligil, G.S. (2007). Treatment of diabetes and atherosclerosis by inhibiting fatty-acid-binding protein aP2. *Nature* 447, 959-965.

Le Lay, J., Tuteja, G., White, P., Dhir, R., Ahima, R., and Kaestner, K.H. (2009). CRTC2 (TORC2) contributes to the transcriptional response to fasting in the liver but is not required for the maintenance of glucose homeostasis. *Cell Metab* 10, 55-62.
